# Supplementary material for: Nanosized Cu-MOFs induced by graphene oxide and enhanced gas storage capacity
Source: Royal Society of Chemistry journal article supplement (doi:10.1039/c3ee23421e), 2013-01-01
Supplement: c3ee23421e.pdf [file c3ee23421e.pdf]

## Supporting information

# Nanosized Cu-MOF induced by graphene oxide and enhanced gas storage capacity

Shuang Liu<sup>a,c</sup>, Lixian Sun<sup>a,b\*</sup>, Fen Xu<sup>b,d\*</sup>, Jian Zhang<sup>a</sup>, Chengli Jiao<sup>a</sup>, Fen Li<sup>a</sup>, Zhibao Li<sup>a,c</sup>, Shuang Wang<sup>a,c</sup>, Ziqiang Wang<sup>a,c</sup>, Xia Jiang<sup>a,c</sup>, Huaiying Zhou<sup>b</sup>, Lini Yang<sup>e</sup> and Christoph Schick<sup>f</sup>

<sup>a</sup> Materials and Thermochemistry Laboratory, Dalian Institute of Chemical Physics, Chinese Academy of Sciences, Dalian 116023, China.

<sup>b</sup> Graduate School of Chinese Academy of Sciences, Beijing 100049, China.

<sup>c</sup> Faculty of Chemistry and Chemical Engineering, Liaoning Normal University, Dalian 116029, China.

<sup>d</sup> Department of Material Science & Engineering, Guilin University of Electrical Technology, Guilin, 541004, China.

<sup>e</sup> Department of Chemistry, Liaoning University, Shenyang, 110036, China

<sup>f</sup> Institute of Physics, Universität Rostock, Rostock D-18059, Germany

\* Corresponding author. Tel./Fax: +86-411-84379213.

E-mail address: [lsxun@dicp.ac.cn](mailto:lsxun@dicp.ac.cn) (Lixian Sun); [xufen@lnu.edu.cn](mailto:xufen@lnu.edu.cn) (Fen Xu)

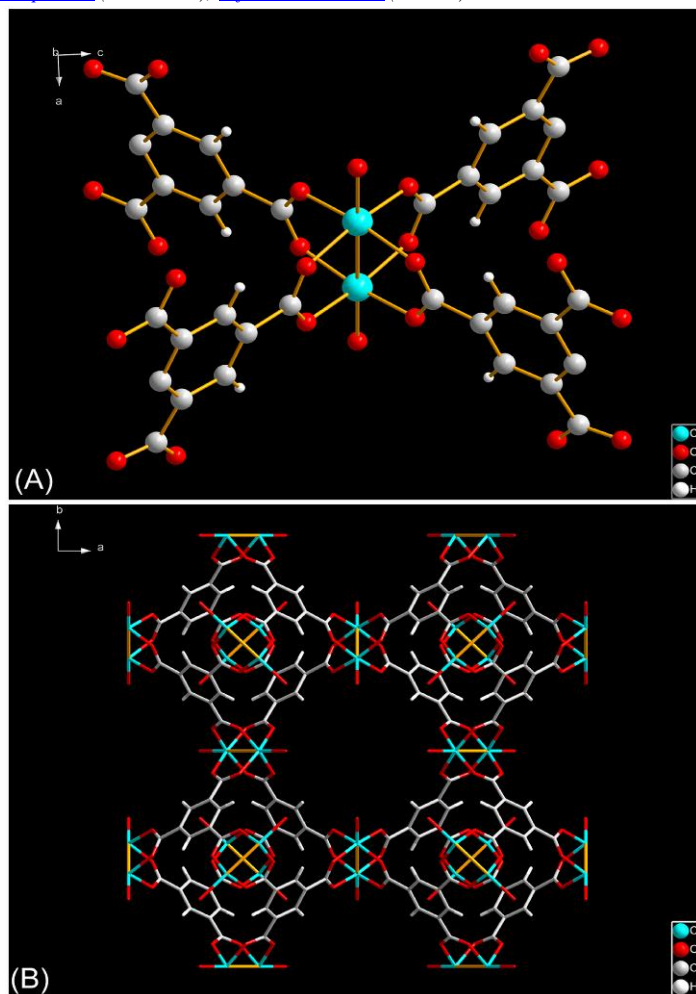

Fig. S1 (A) Dicopper (II) tetracarboxylate building block for Cu-BTC; (B)  $[\text{Cu}_3(\text{BTC})_2(\text{H}_2\text{O})_3]_n$  polymer framework viewed down the [100] direction, showing nanochannels with fourfold symmetry.

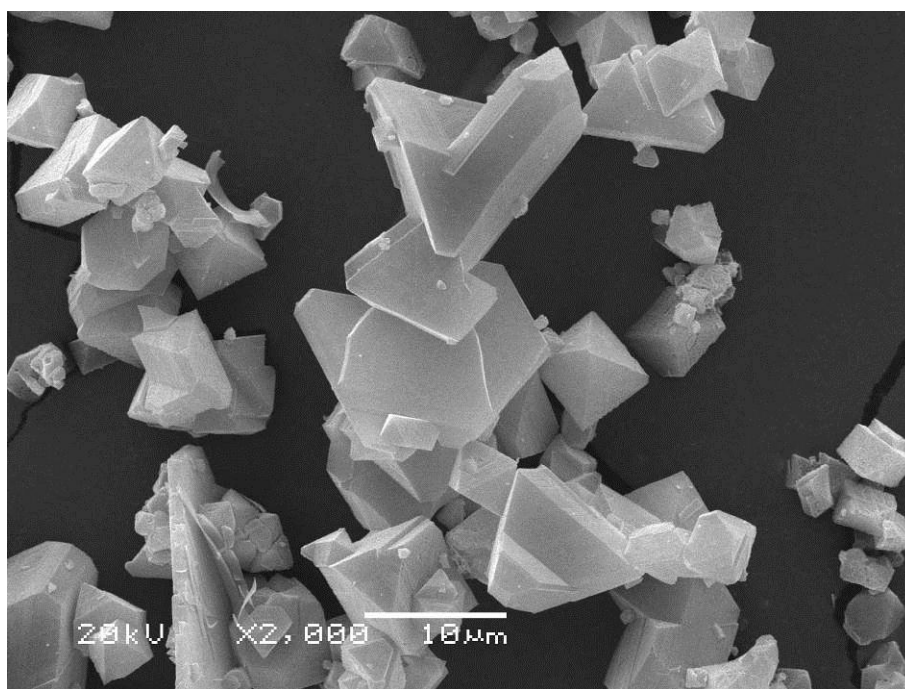

Fig. S2 SEM micrograph of Cu-BTC crystals.

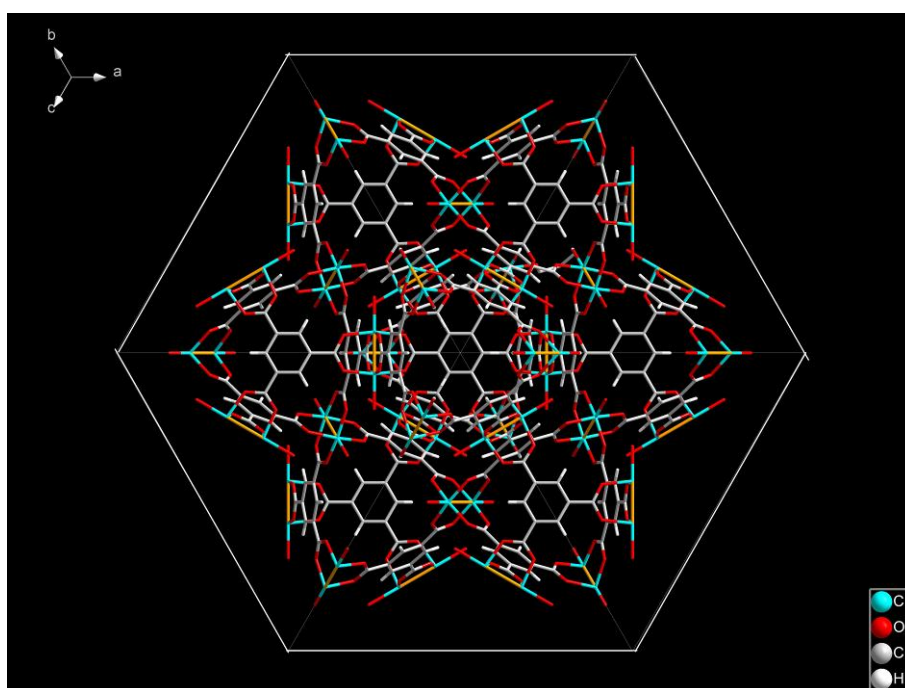

Fig. S3  $[\text{Cu}_3(\text{BTC})_2(\text{H}_2\text{O})_3]_n$  polymer framework viewed down the [100] direction, showing a hexagon.

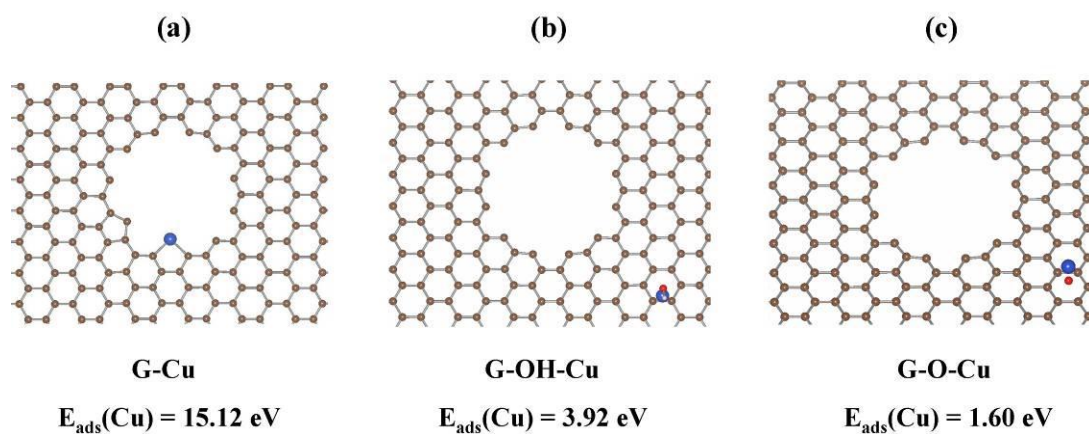

Fig. S4 (a) Cu adsorbed on the defect of GO; (b) Cu adsorbed on the  $-\text{OH}$  group of the GO surface; (c) Cu adsorbed on the  $-\text{O}-$  group of the GO surface.

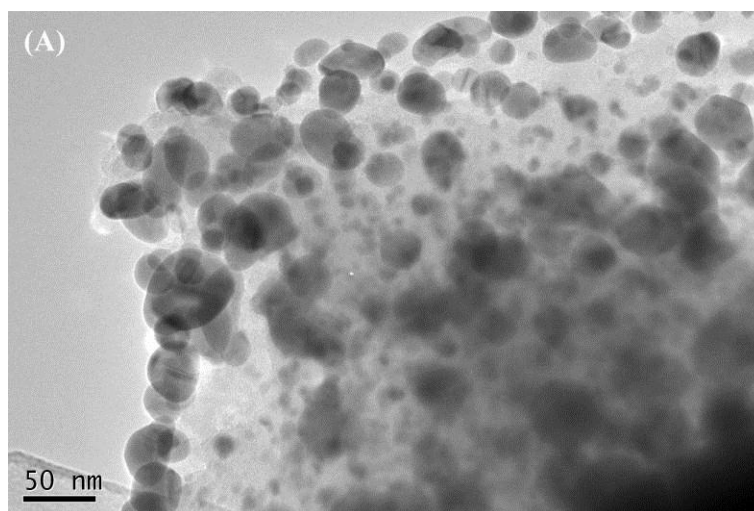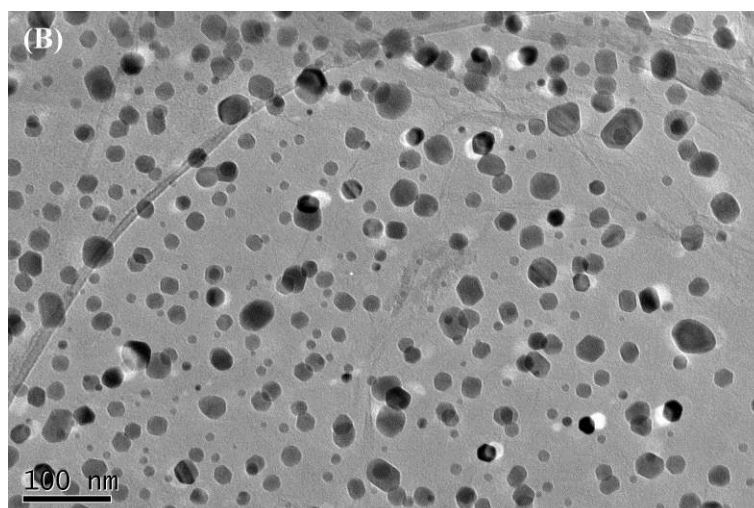

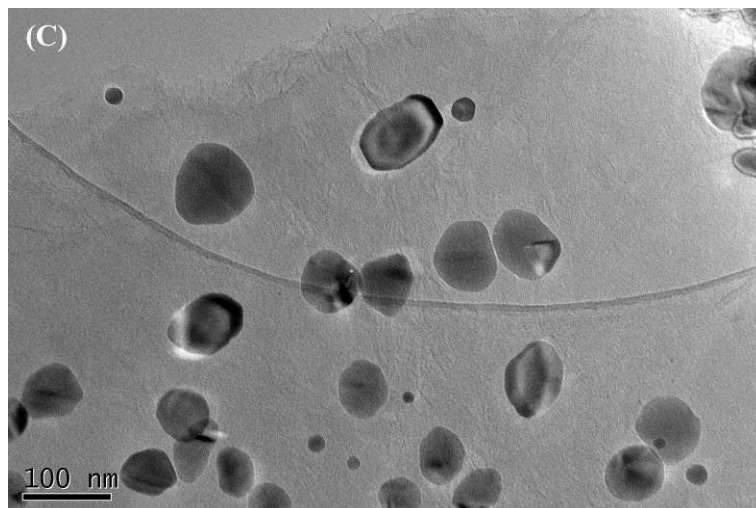

Fig. S5 HRTEM images of (A) CG-3,(B) CG-9 and (C) CG-15.

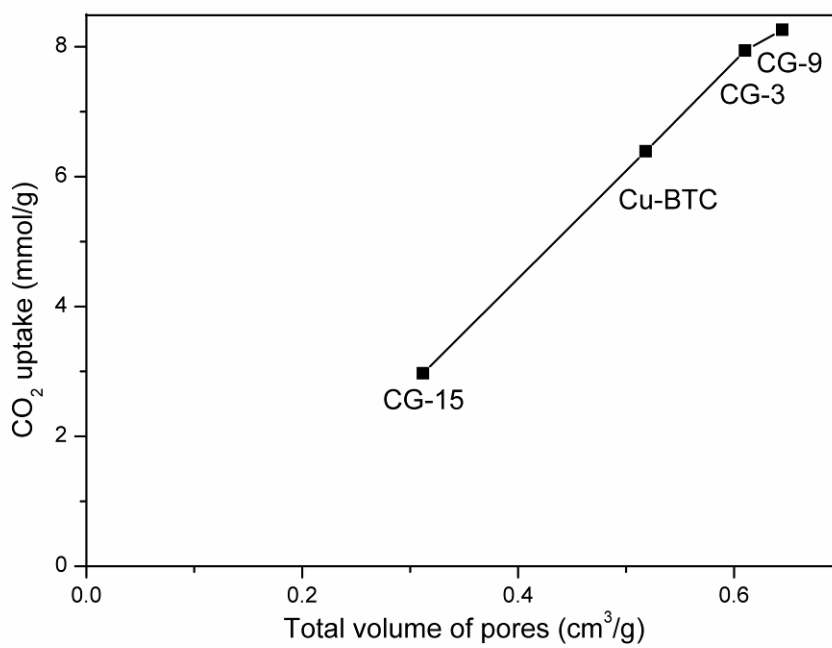

Fig. S6 Carbon dioxide storage plotted against total volume of pores.

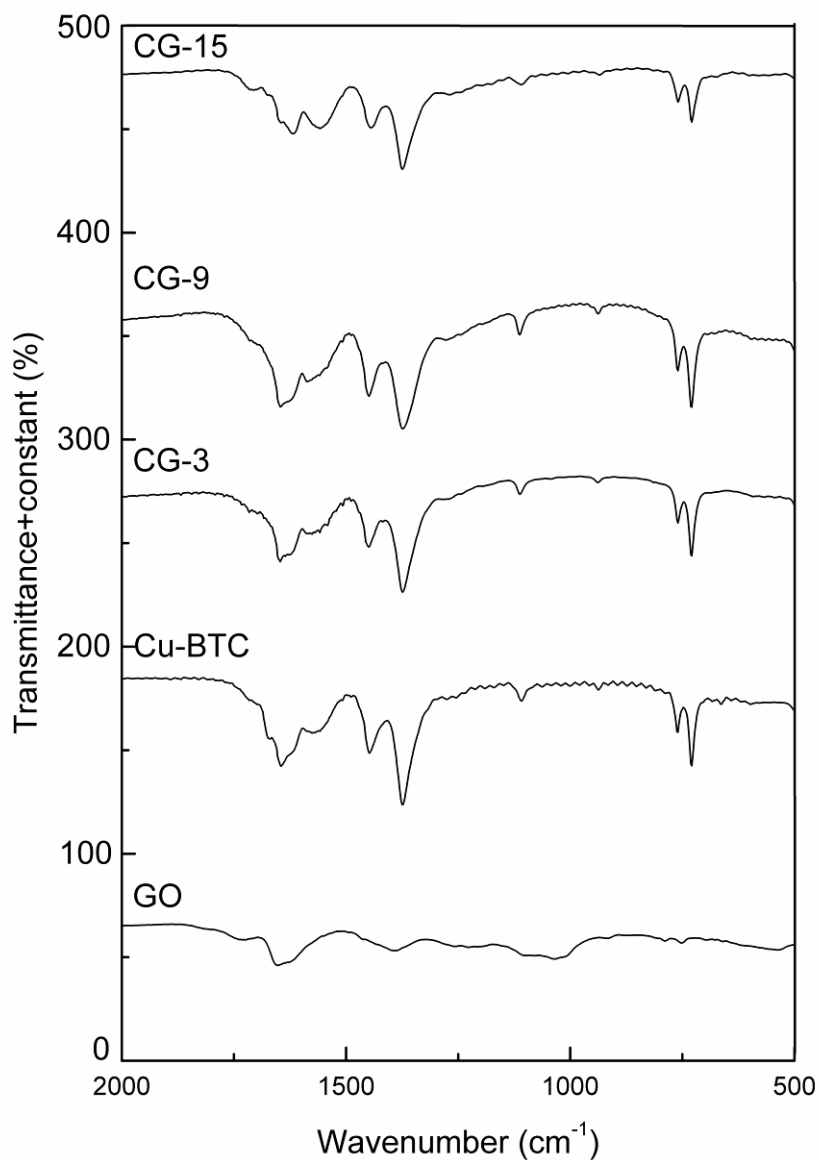

Fig. S7 FT-IR spectra of the parent materials and the composites.

The FT-IR spectra of the materials were recorded. The range above 2000 cm<sup>-1</sup> does not present features relevant to this analysis, so only the range between 500 and 2000 cm<sup>-1</sup> is reported. The vibrational peaks of GO are consistent with fingerprint groups such as carboxylic species; hydroxyl species and epoxy species (C=O, 1720-1740 cm<sup>-1</sup>; OH deformation, ~1390 cm<sup>-1</sup>; C-O stretching, 1230-1250 cm<sup>-1</sup>; C-O-C stretching, ~1060 cm<sup>-1</sup>; C=C from unoxidized sp<sup>2</sup> CC bonds, 1630-1650 cm<sup>-1</sup>).

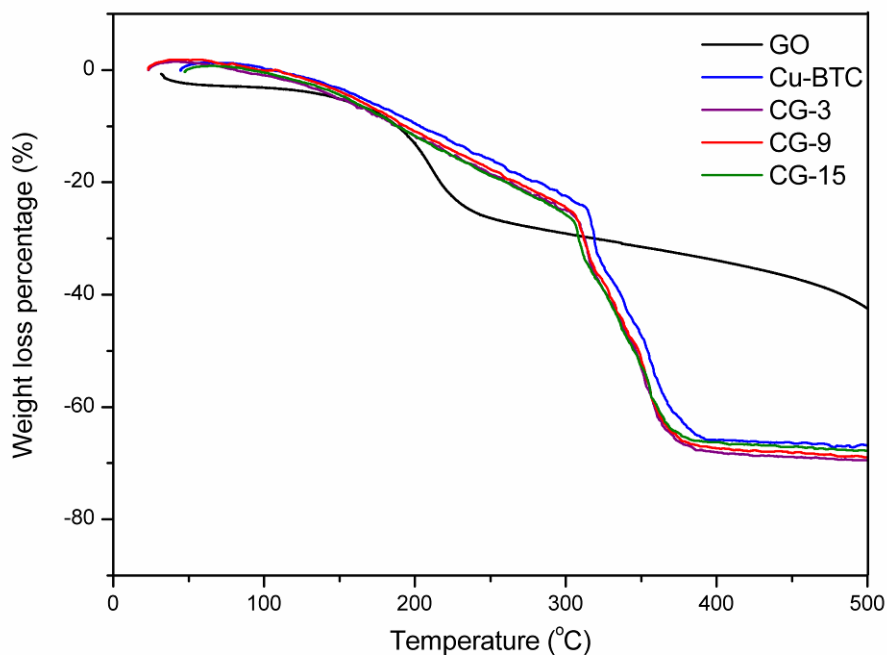

Fig. S8 TGA plots of the parent materials and the composites.

The thermal decomposition of GO can be accompanied by a vigorous release of gas, resulting in a rapid thermal expansion of the material. This is evident by both a large volume expansion and a larger mass loss (from flying GO debris in the TGA instrument) at a rapid heating regime (5 °C/min). Therefore, we did the TGA experiment of GO at a lower heating regime (1 °C/min) for precision analysis. The difference of the hypothetical values between weight loss percentage of Cu-BTC and composites can be ignored taking into account the percentage of each component in the composites and the weight loss percentage of GO and Cu-BTC alone. Eq. (1) provides the details of the calculation:

$$X_n = X_{GO} \times \text{wt.\%}_{GO} + X_{Cu-BTC} \times \text{wt.\%}_{Cu-BTC} \quad (1)$$

where “ $X_n$ ” is the weight loss percentage of composite CG-n to determine, “ $X_{GO}$ ” and “ $X_{Cu-BTC}$ ” are the weight loss percentage of GO and Cu-BTC separately, and “ $\text{wt.\%}_{GO}$ ” and “ $\text{wt.\%}_{Cu-BTC}$ ” are the weight percentages of GO and Cu-BTC in CG-n.

$X_{Cu-BTC} - X_{CG-3} = 0.73\%$ ;  $X_{Cu-BTC} - X_{CG-9} = 2.2\%$ ;  $X_{Cu-BTC} - X_{CG-15} = 3.6\%$ ; ( $X_{GO} = 42.6\%$  and  $X_{Cu-BTC} = 66.8\%$  at 500 °C)

The TGA curves (see below figure) for the composites look rather similar to that of Cu-BTC, but the major weight loss related to the GO in composite is absent. An explanation should be the formation of the composites via interaction between the cupric ions from Cu-BTC and the epoxy groups on the surface of GO, which prevents the decompose of GO at lower temperature.

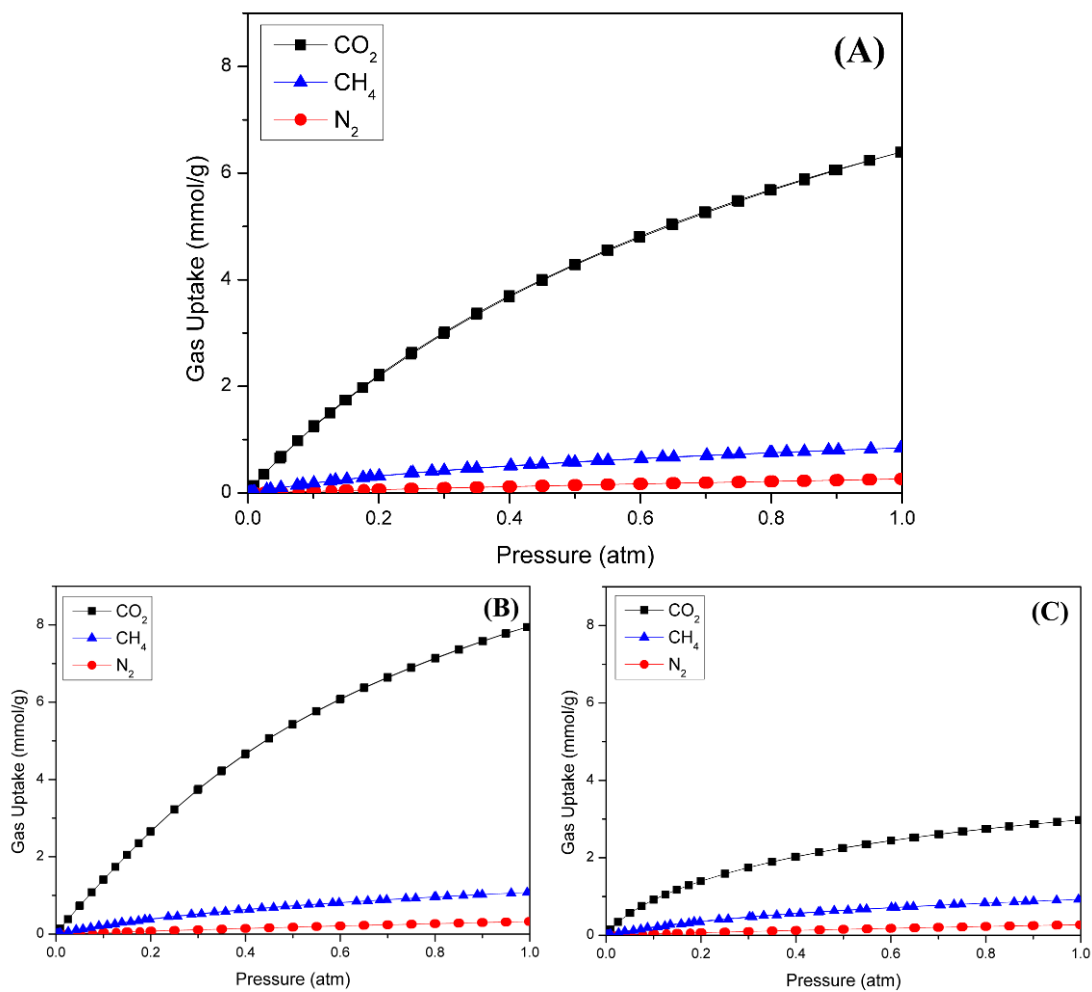

Fig. S9 Adsorption isotherms of Cu-BTC(A), CG-3(B) and CG-15(C) for CO<sub>2</sub>, CH<sub>4</sub> and N<sub>2</sub> at 273K.

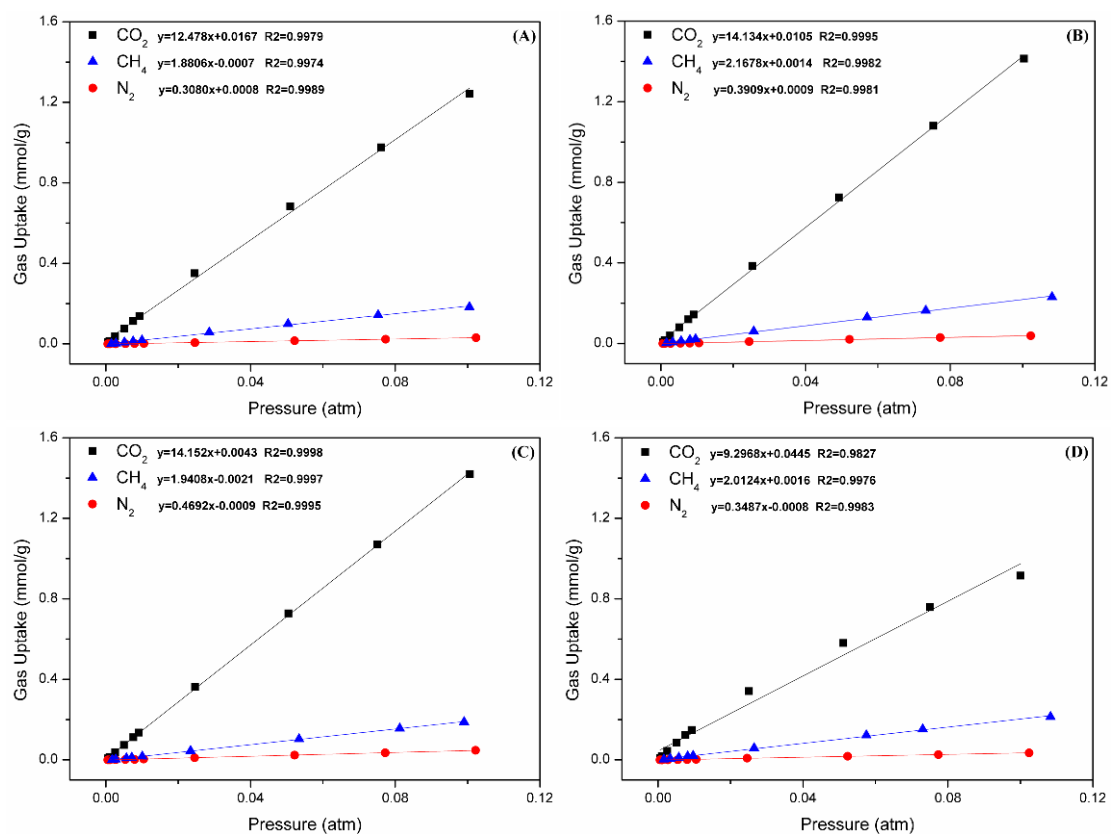

Fig. S10 Initial slope calculation of Cu-BTC (A), CG-3 (B), CG-9 (C) and CG-15 (D) for CO<sub>2</sub>, CH<sub>4</sub> and N<sub>2</sub> isotherms collected at 273K.
